# Supplementary material
Source: PubMed Central journal article supplement (PMC10164352)
Supplement: NIHMS1872706-supplement-Supplemental_Publication_Material.pdf [file NIHMS1872706-supplement-Supplemental_Publication_Material.pdf]

## SUPPLEMENTAL MATERIALS

### **Sex Differences in Vascular Response to Mental Stress and Adverse Cardiovascular Events among Patients with Ischemic Heart Disease**

Samaah Sullivan, PhD<sup>1,2</sup>; An Young, MD, MPH<sup>2,3</sup>; Mariana Garcia, MD<sup>2,3</sup>; Zakaria Almuwaqqat, MD, MPH<sup>2,3</sup>; Kasra Moazzami, MD<sup>2,3</sup>; Muhammad Hammadah, MD<sup>3</sup>; Bruno B. Lima, MD, PhD<sup>3</sup>; Yingtian Hu, BS<sup>5</sup>; Mohamad Nour Jajeh, MD<sup>2</sup>; Ayman Alkhoder, MD<sup>3</sup>; Lisa Elon, MS, MPH<sup>5</sup>; Tené T. Lewis, PhD<sup>7</sup>; Amit J. Shah, MD, MSCR<sup>2,3,7</sup>; Puja Mehta, MD<sup>3</sup>; J. Douglas Bremner, MD<sup>4,7</sup>; Arshed A. Quyyumi, MD<sup>3</sup>; and Viola Vaccarino, MD, PhD.<sup>2,3</sup>

<sup>1</sup>Department of Epidemiology, Human Genetics and Environmental Sciences, The University of Texas Health Science Center at Houston, Dallas, TX; <sup>2</sup>Departments of Epidemiology, <sup>3</sup>Medicine, <sup>4</sup>Psychiatry and Behavioral Sciences, <sup>5</sup>Biostatistics and Bioinformatics, <sup>6</sup>Pediatrics, Emory University, Atlanta, GA; <sup>7</sup>Atlanta VA Medical Center, Atlanta, GA.

## Major Resources Table

In order to allow validation and replication of experiments, all essential research materials listed in the Methods should be included in the Major Resources Table below. Authors are encouraged to use public repositories for protocols, data, code, and other materials and provide persistent identifiers and/or links to repositories when available. Authors may add or delete rows as needed.

### Animals (in vivo studies): NA

| Species | Vendor or Source | Background Strain | Sex | Persistent ID / URL |
|---------|------------------|-------------------|-----|---------------------|
|         |                  |                   |     |                     |
|         |                  |                   |     |                     |
|         |                  |                   |     |                     |

### Genetically Modified Animals: NA

|                 | Species |  | Vendor or Source | Background Strain | Other Information | Persistent ID / URL |
|-----------------|---------|--|------------------|-------------------|-------------------|---------------------|
| Parent - Male   |         |  |                  |                   |                   |                     |
| Parent - Female |         |  |                  |                   |                   |                     |

### Antibodies: NA

| Target antigen | Vendor or Source | Catalog # | Working concentration | Lot # (preferred but not required) | Persistent ID / URL |
|----------------|------------------|-----------|-----------------------|------------------------------------|---------------------|
|                |                  |           |                       |                                    |                     |
|                |                  |           |                       |                                    |                     |

### DNA/cDNA Clones: NA

| Clone Name | Sequence | Source / Repository | Persistent ID / URL |
|------------|----------|---------------------|---------------------|
|            |          |                     |                     |
|            |          |                     |                     |
|            |          |                     |                     |

### Cultured Cells: NA

| Name | Vendor or Source | Sex (F, M, or unknown) | Persistent ID / URL |
|------|------------------|------------------------|---------------------|
|      |                  |                        |                     |
|      |                  |                        |                     |
|      |                  |                        |                     |

### Data & Code Availability: NA

| Description | Source / Repository | Persistent ID / URL |
|-------------|---------------------|---------------------|
|             |                     |                     |
|             |                     |                     |
|             |                     |                     |

### Other: NA

| Description | Source / Repository | Persistent ID / URL |
|-------------|---------------------|---------------------|
|             |                     |                     |
|             |                     |                     |
|             |                     |                     |

**Table S1.** Microvascular Response to Stress (Dichotomized) and Risk of Major Adverse Cardiovascular Events (MACE).

|                                           | <b>Total Sample</b> |          | <b>Women</b>       |          | <b>Men</b>         |          | <b>p-value<br/>Sex Interaction</b> |
|-------------------------------------------|---------------------|----------|--------------------|----------|--------------------|----------|------------------------------------|
|                                           | <b>HR (95% CI)</b>  | <b>p</b> | <b>HR (95% CI)</b> | <b>p</b> | <b>HR (95% CI)</b> | <b>p</b> |                                    |
| <b>Microvascular Response LT 0 (RHI)*</b> |                     |          |                    |          |                    |          |                                    |
| Model 1                                   | 2.10 (1.47, 3.00)   | <.0001   | 2.93 (1.65, 5.22)  | 0.0003   | 1.85 (1.17, 2.94)  | 0.01     | 0.21                               |
| Model 2                                   | 2.12 (1.47, 3.05)   | <.0001   | 2.81 (1.57, 5.01)  | 0.001    | 1.74 (1.09, 2.78)  | 0.02     | 0.20                               |
| Model 3                                   | 1.39 (0.95, 2.04)   | 0.09     | 2.05 (1.13, 3.75)  | 0.02     | 1.06 (0.65, 1.73)  | 0.80     | 0.09                               |
| Model 4                                   | 1.29 (0.87, 1.92)   | 0.20     | 2.17 (1.16, 4.03)  | 0.01     | 0.89 (0.54, 1.48)  | 0.66     | 0.03                               |
| Model 5                                   | 1.32 (0.88, 1.96)   | 0.18     | 2.05 (1.10, 3.82)  | 0.02     | 0.95 (0.57, 1.59)  | 0.06     | 0.06                               |
| Model 6                                   | 1.49 (0.99, 2.24)   | 0.05     | 2.31 (1.22, 4.40)  | 0.01     | 1.10 (0.66, 1.85)  | 0.71     | 0.07                               |

Model 1: Includes vascular measure; Sex specific models includes vascular measure, sex, and their interaction.

Model 2: Model 1 + age, sex, race, and education

Model 3: Model 2 covariates + clinical risk factors (ever smoking, BMI, hypertension, diabetes, dyslipidemia, ejection fraction)

Model 4: Model 3 covariates + medications (beta-blockers, statins, ACE inhibitors, and aspirin).

Model 5: Model 4 covariates + psychological factors (beck depression inventory, PTSD symptoms)

Model 6: Model 5 covariates + mental stress induced myocardial ischemia

\* All models adjusted for baseline RHI
